# Supplementary material
Source: PubMed Central journal article supplement (PMC4184460)
Supplement: jo501670e_si_003.pdf [file jo501670e_si_003.pdf]

## Supporting Information for:

### Direct Reaction of Amides with Nitric Oxide to Form Diazeniumdiolates

Ryan J. Holland,<sup>\*,†</sup> John R. Klose,<sup>§</sup> Jeffrey R. Deschamps,<sup>‡</sup> Zhao Cao,<sup>§</sup> Larry K. Keefer,<sup>†</sup>  
and Joseph E. Saavedra<sup>§</sup>

#### TABLE OF CONTENTS

|                                                               |     |
|---------------------------------------------------------------|-----|
| <sup>1</sup> H and <sup>13</sup> C NMR spectra for <b>1a</b>  | S2  |
| <sup>1</sup> H and <sup>13</sup> C NMR spectra for <b>1b</b>  | S4  |
| <sup>1</sup> H and <sup>13</sup> C NMR spectra for <b>2</b>   | S6  |
| <sup>1</sup> H and <sup>13</sup> C NMR spectra for <b>4b</b>  | S8  |
| <sup>1</sup> H and <sup>13</sup> C NMR spectra for <b>4b'</b> | S10 |
| Crystallographic Information Files for <b>2</b> and <b>4b</b> | S12 |

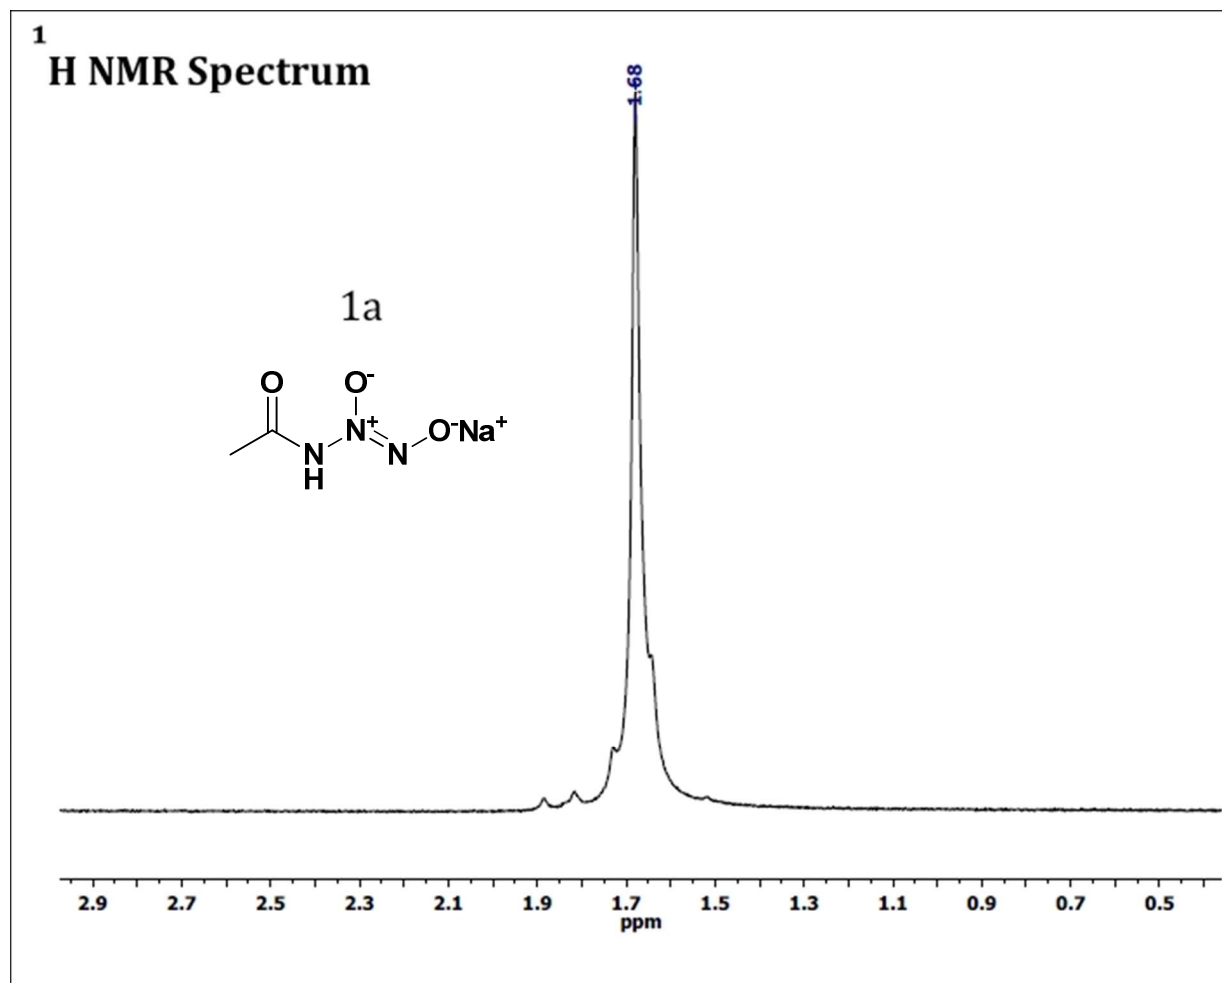

**Figure S1.** <sup>1</sup>H NMR spectrum of compound **1a** in D<sub>2</sub>O/NaOD at 25 °C.

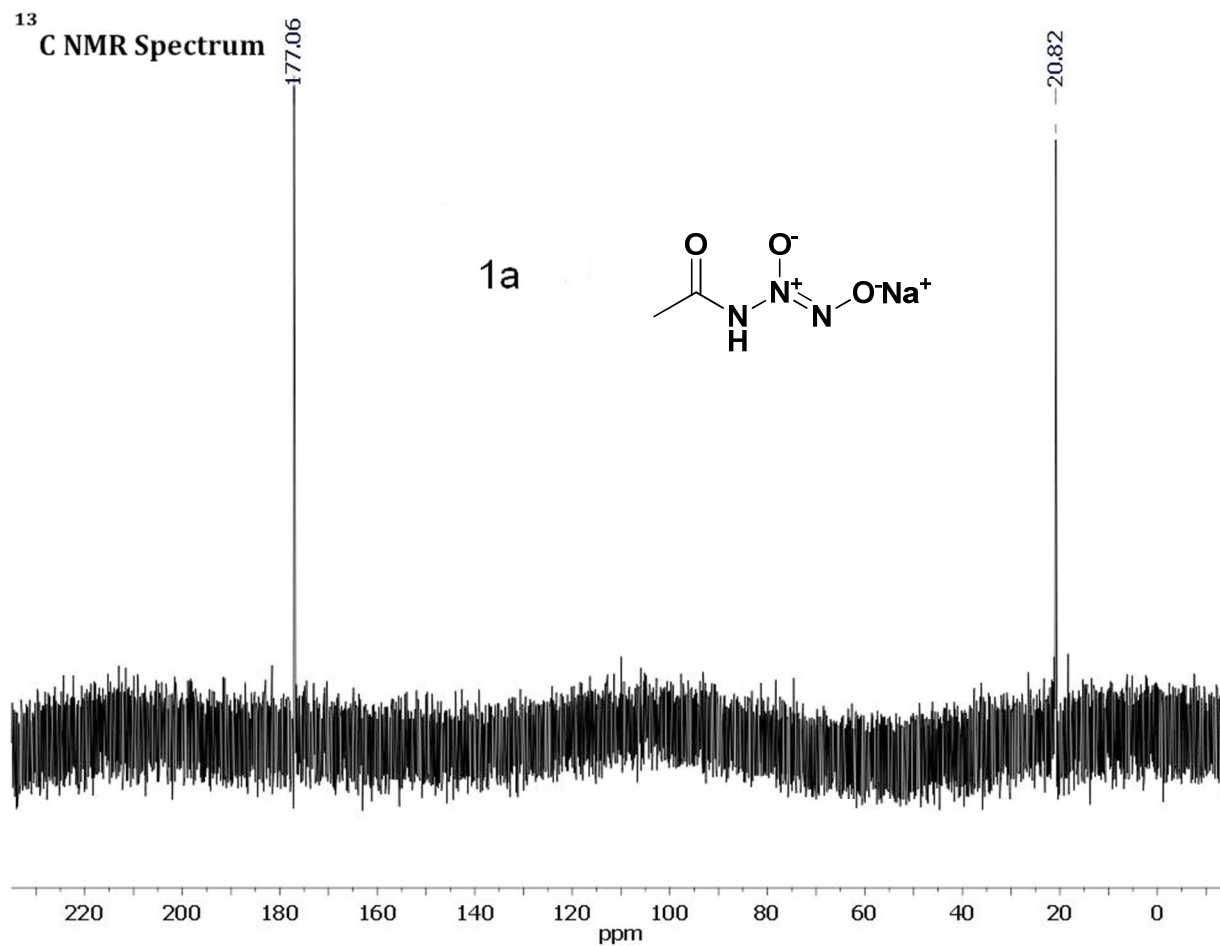

**Figure S2.** <sup>13</sup>C NMR spectrum of compound **1a** in D<sub>2</sub>O/NaOD at 25 °C.

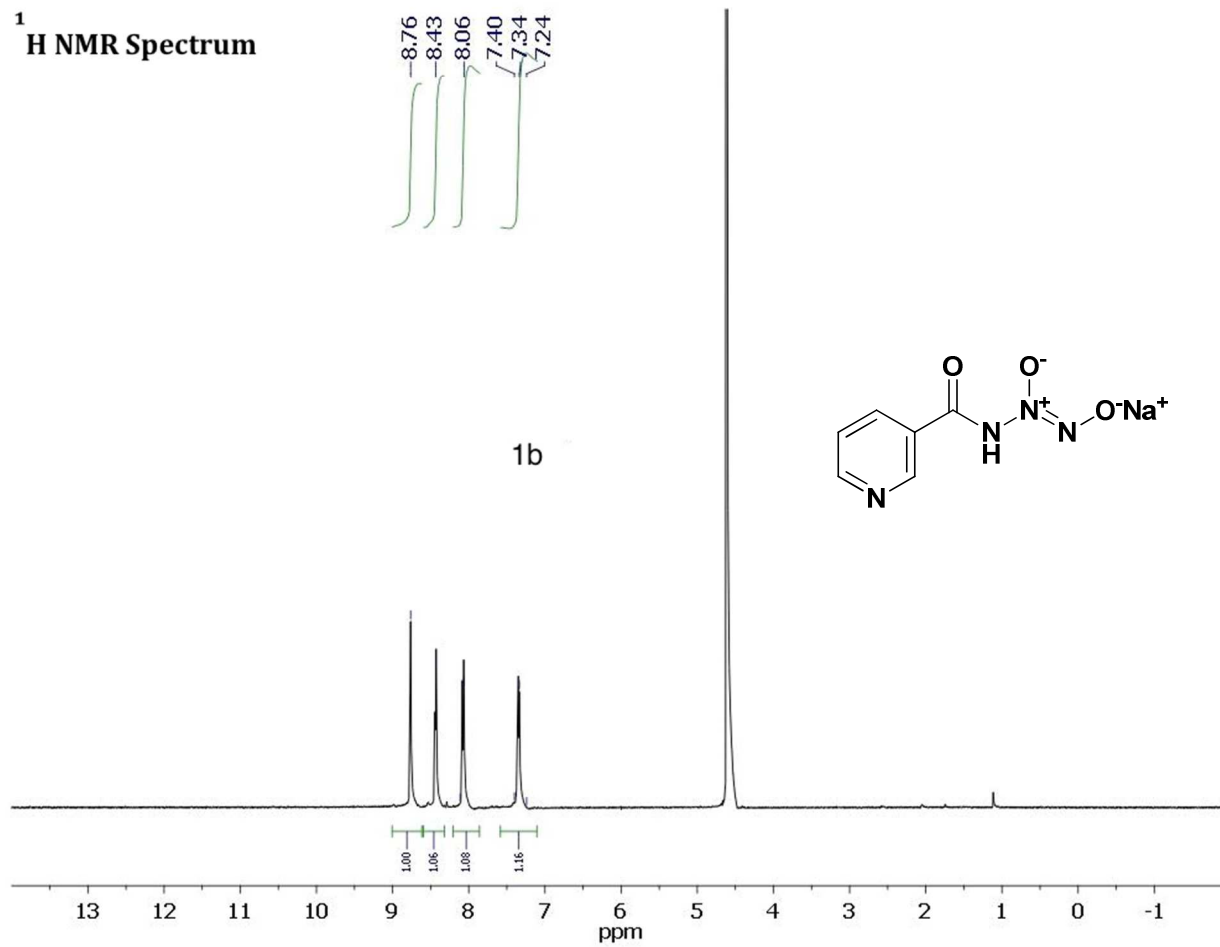

**Figure S3.** <sup>1</sup>H NMR spectrum of compound **1b** in D<sub>2</sub>O/NaOD at 25 °C.

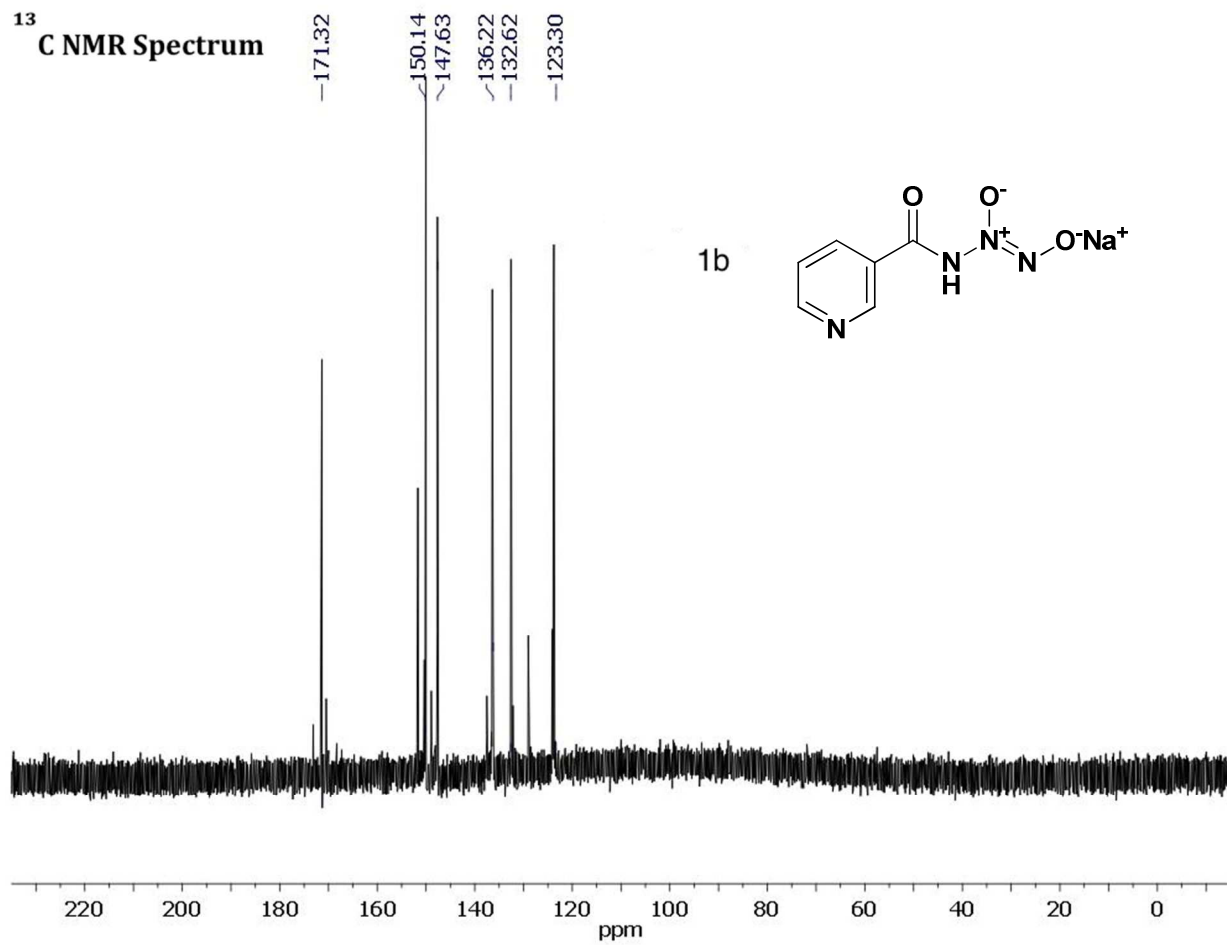

**Figure S4.** <sup>13</sup>C NMR spectrum of compound **1b** in D<sub>2</sub>O/NaOD at 25 °C.

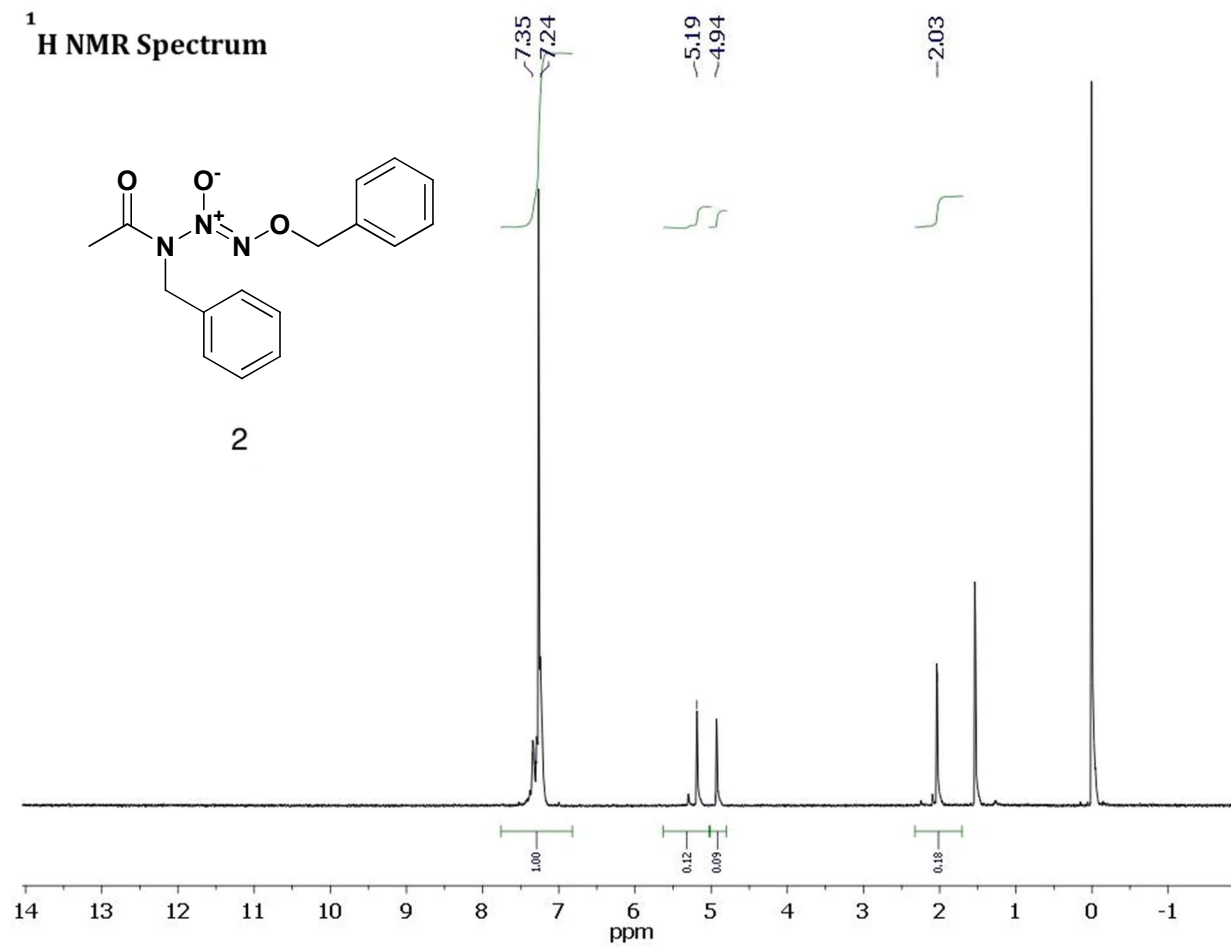

**Figure S5.** <sup>1</sup>H NMR spectrum of compound **1b** in CDCl<sub>3</sub> at 25 °C.

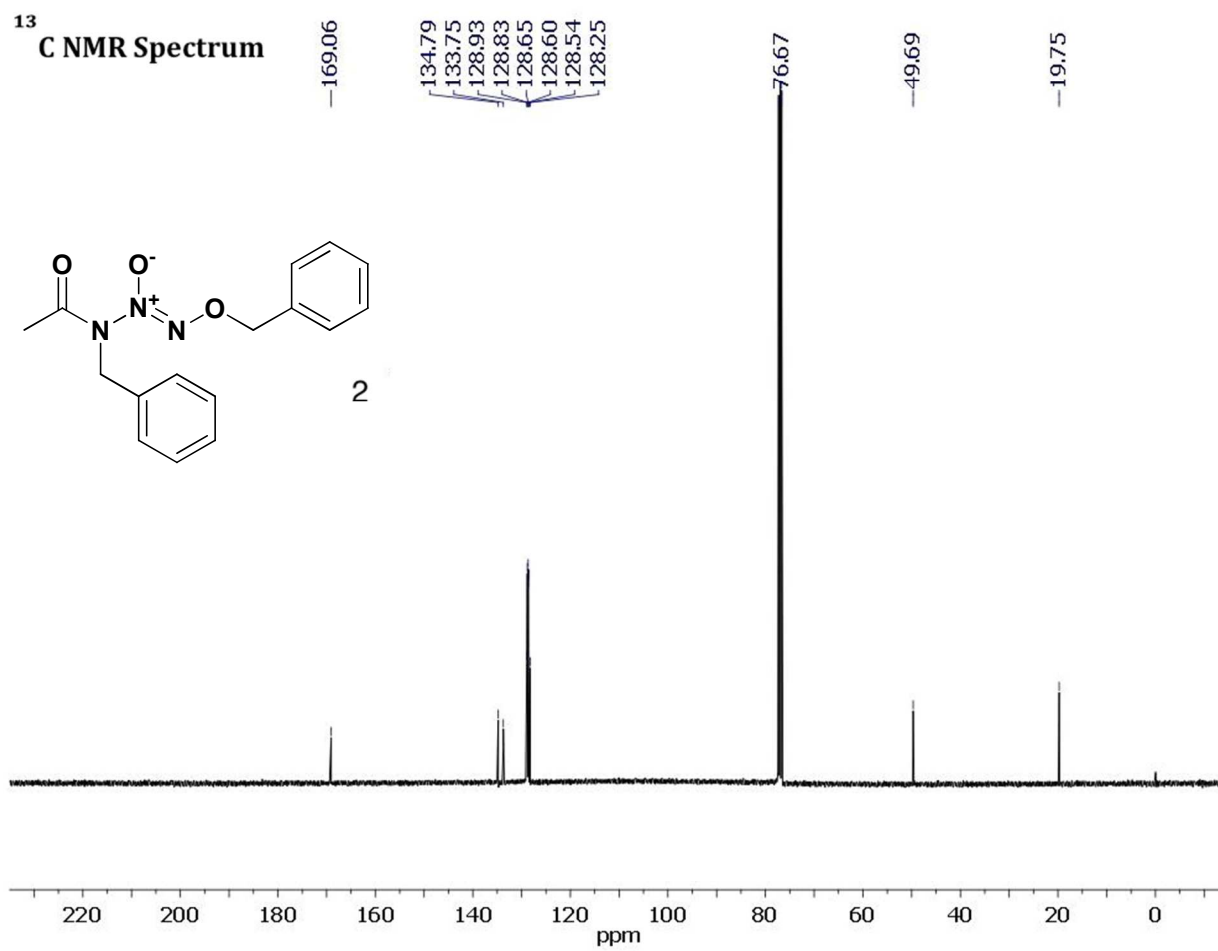

**Figure S6.** <sup>13</sup>C NMR spectrum of compound **2** in CDCl<sub>3</sub> at 25 °C.

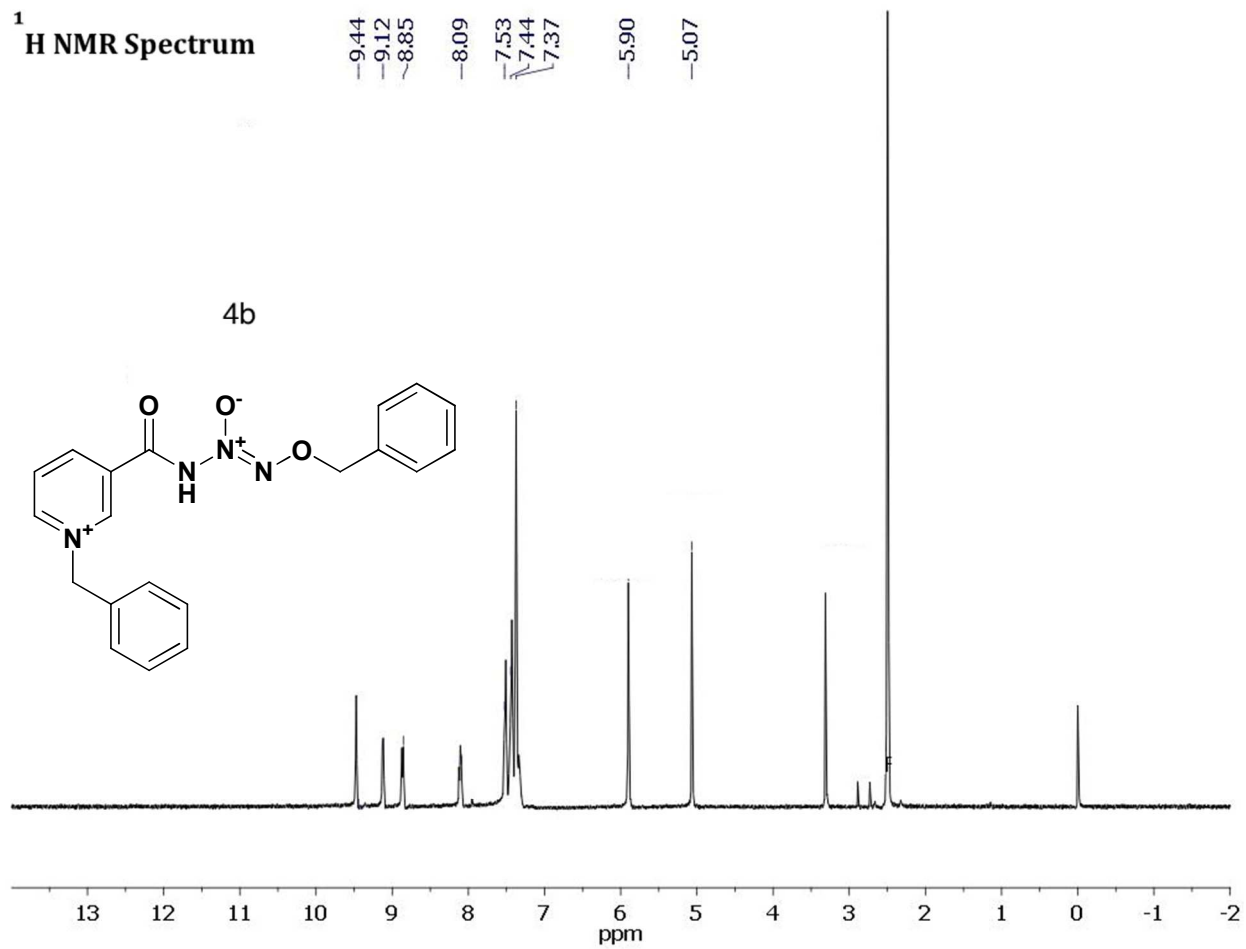

Figure S7. <sup>1</sup>H NMR spectrum of compound **4b** in DMSO-*d*<sub>6</sub> at 25 °C.



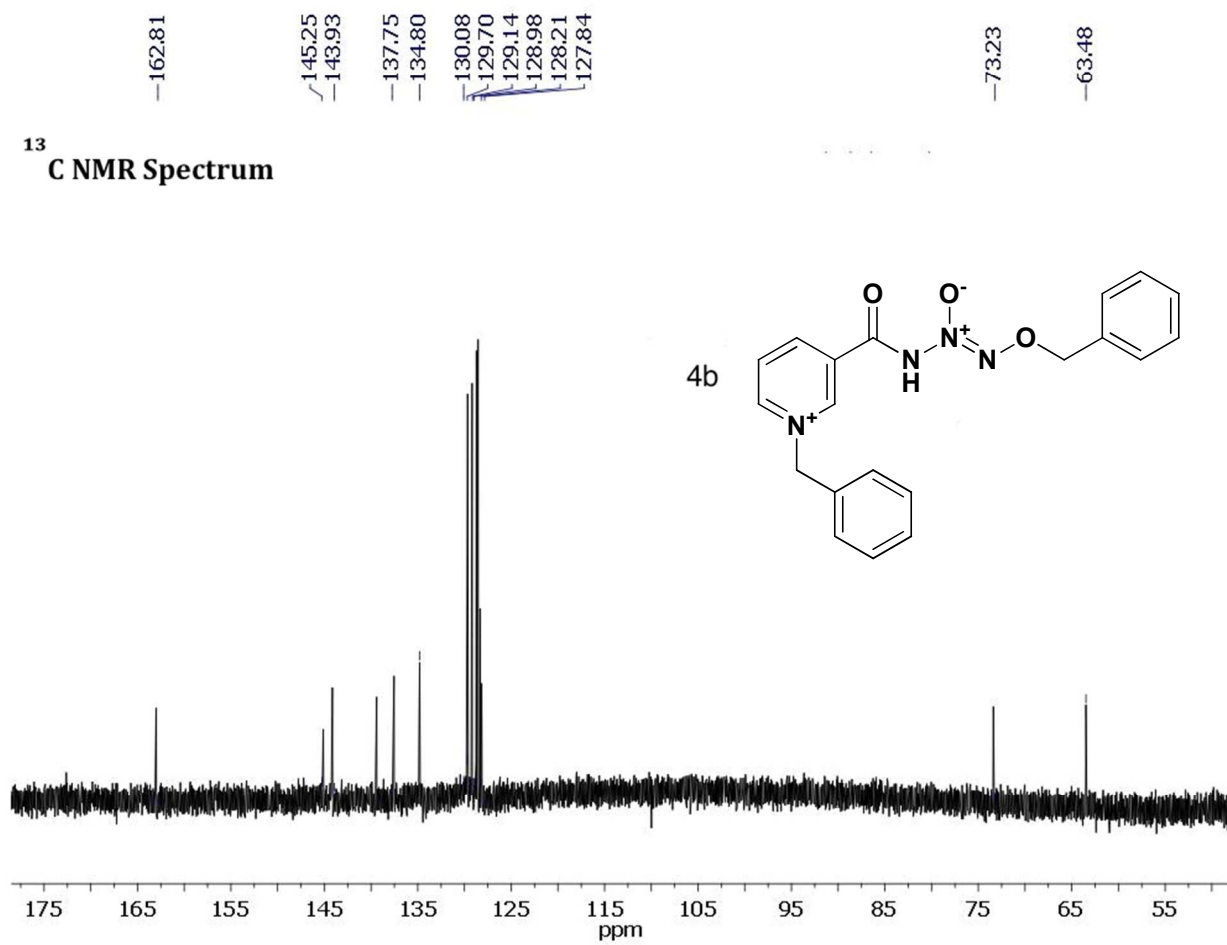

**Figure S8.** <sup>13</sup>C NMR spectrum of compound **4b** in DMSO-*d*<sub>6</sub> at 25 °C.

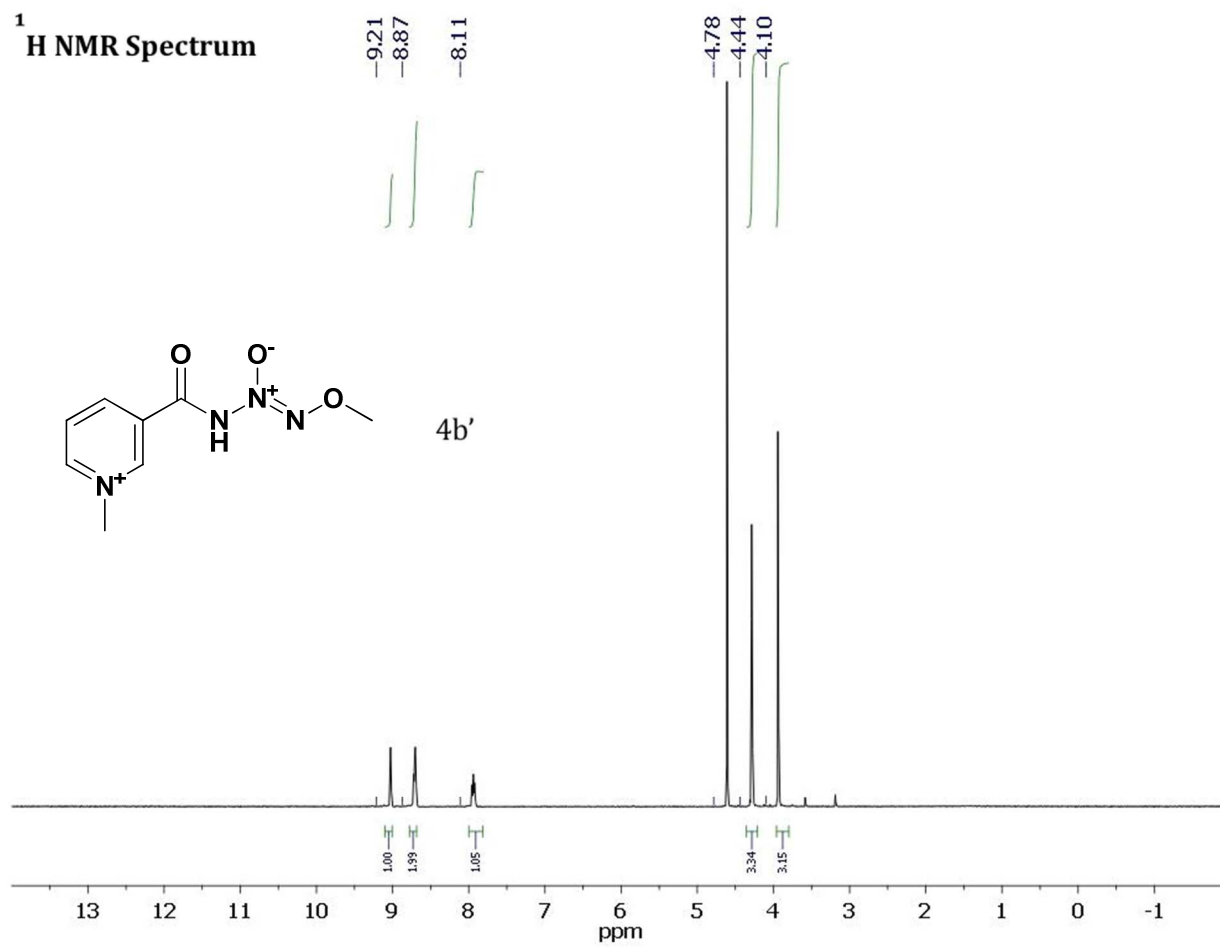

**Figure S9.** <sup>1</sup>H NMR spectrum of compound **4b'** in D<sub>2</sub>O at 25 °C.

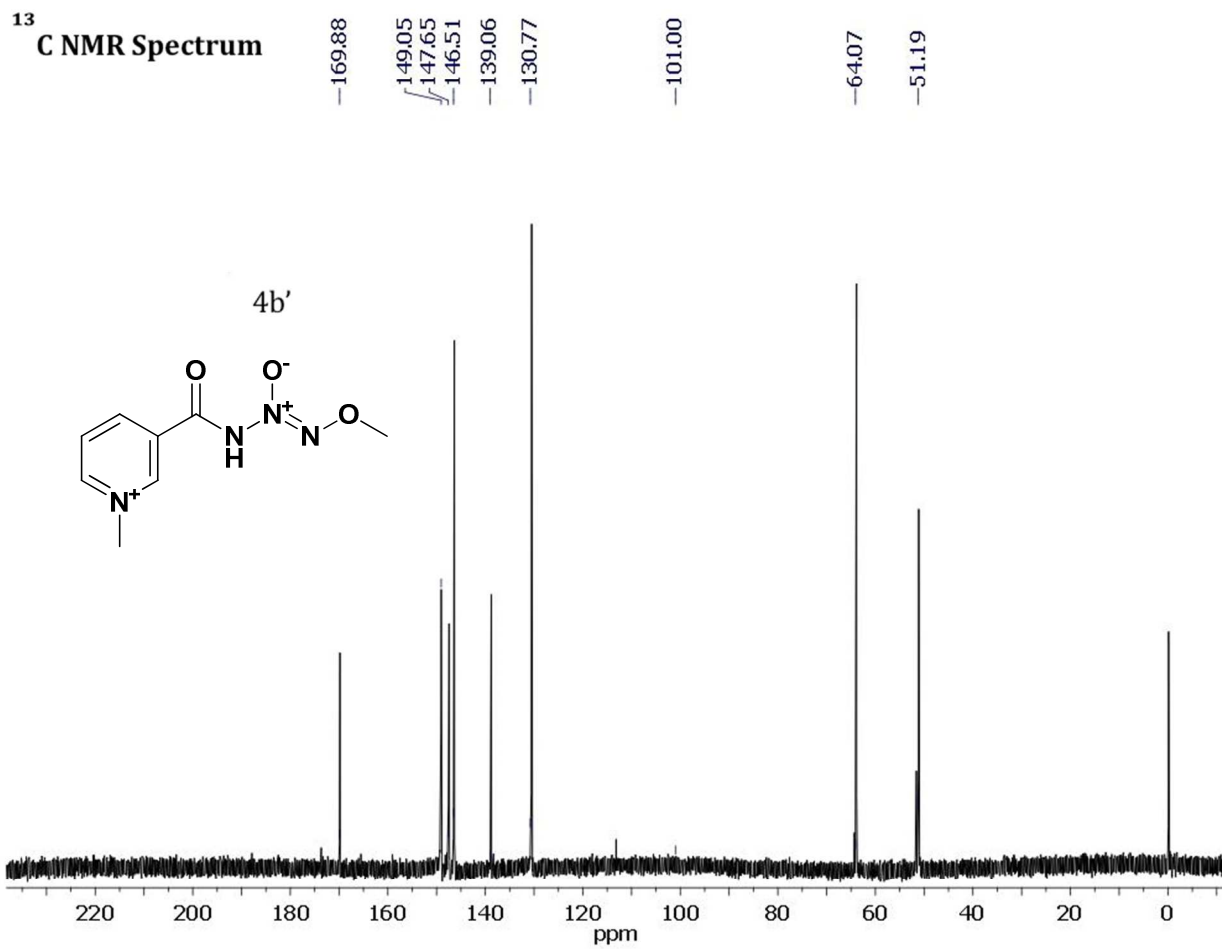

Figure S10. <sup>13</sup>C NMR spectrum of compound 4b' in D<sub>2</sub>O at 25 °C.

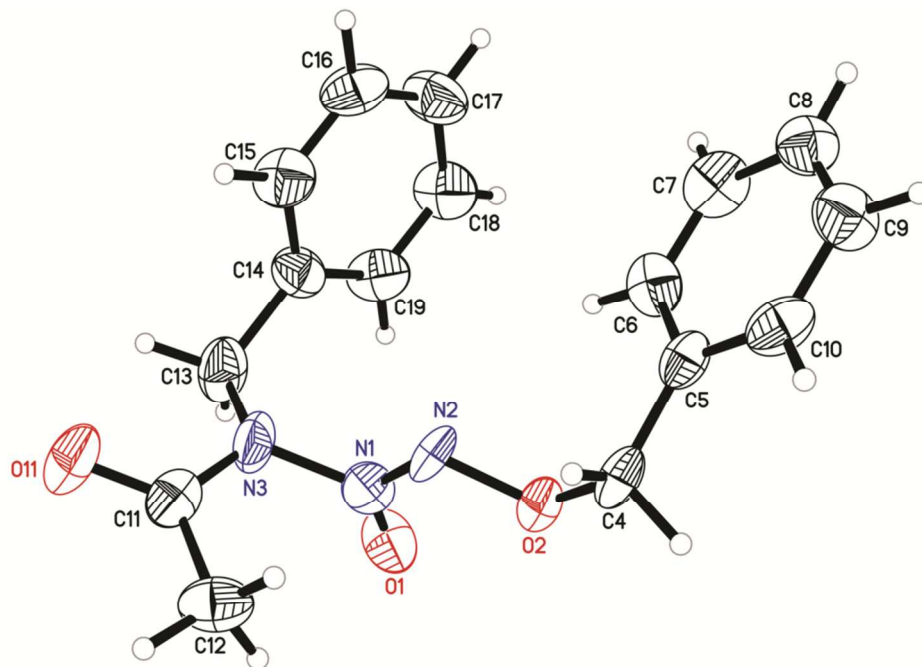

**Figure S11.** Plot of compound **2**. Displacement ellipsoids are at the 50% level.

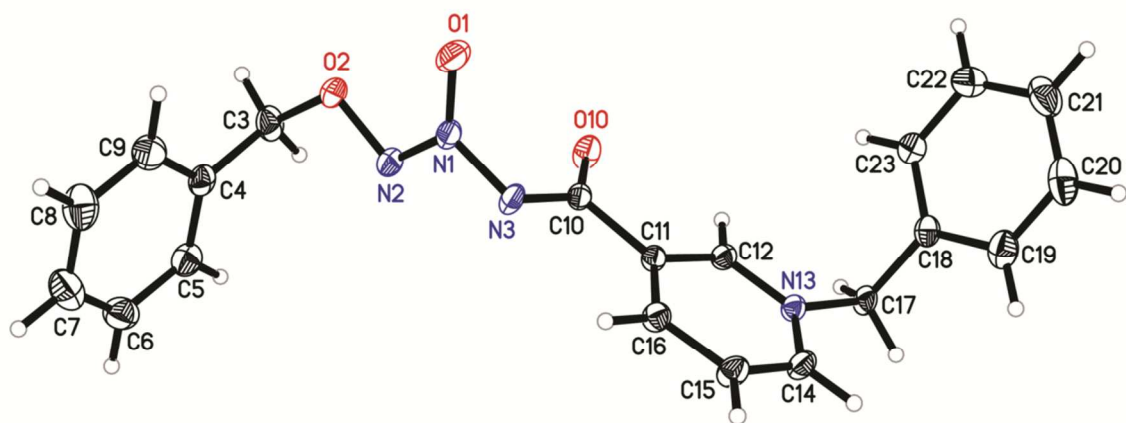

**Figure S12.** Plot of compound **4b**. Displacement ellipsoids are at the 50% level.

**Table S1.** Crystal data and structure refinement for **2**.

|                                      |                                                          |                           |
|--------------------------------------|----------------------------------------------------------|---------------------------|
| Empirical formula                    | $C_{16}H_{17}N_3O_3$                                     |                           |
| Formula weight                       | 299.33                                                   |                           |
| Temperature                          | 150(2) K                                                 |                           |
| Wavelength                           | 0.71073 Å                                                |                           |
| Crystal system                       | Triclinic                                                |                           |
| Space group                          | P -1                                                     |                           |
| Unit cell dimensions                 | $a = 5.429(4)$ Å                                         | $\alpha = 96.30(3)^\circ$ |
|                                      | $b = 8.743(5)$ Å                                         | $\beta = 96.60(3)^\circ$  |
|                                      | $c = 16.342(11)$ Å                                       | $\gamma = 92.33(3)^\circ$ |
| Volume                               | $764.9(9)$ Å <sup>3</sup>                                |                           |
| Z                                    | 2                                                        |                           |
| Density (calculated)                 | 1.300 Mg/m <sup>3</sup>                                  |                           |
| Absorption coefficient               | 0.092 mm <sup>-1</sup>                                   |                           |
| F(000)                               | 316                                                      |                           |
| Crystal size                         | 0.256 x 0.047 x 0.011 mm <sup>3</sup>                    |                           |
| $\phi$ range for data collection     | 1.26 to 23.30°                                           |                           |
| Index ranges                         | $-4 \leq h \leq 6, -9 \leq k \leq 7, -18 \leq l \leq 17$ |                           |
| Reflections collected                | 2961                                                     |                           |
| Independent reflections              | 2034 [R(int) = 0.2410]                                   |                           |
| Completeness to $\phi = 23.30^\circ$ | 92.5 %                                                   |                           |
| Absorption correction                | Semi-empirical from equivalents                          |                           |
| Max. and min. transmission           | 0.9990 and 0.9769                                        |                           |
| Refinement method                    | Full-matrix least-squares on F <sup>2</sup>              |                           |
| Data / restraints / parameters       | 2034 / 0 / 201                                           |                           |
| Goodness-of-fit on F <sup>2</sup>    | 0.703                                                    |                           |
| Final R indices [I > 2σ(I)]          | R1 = 0.0772, wR2 = 0.1677                                |                           |
| R indices (all data)                 | R1 = 0.2446, wR2 = 0.2435                                |                           |
| Extinction coefficient               | 0.020(7)                                                 |                           |
| Largest diff. peak and hole          | 0.272 and -0.258 e.Å <sup>-3</sup>                       |                           |

**Table S2.** Atomic coordinates ( $\times 10^4$ ) and equivalent isotropic displacement parameters ( $\text{\AA}^2 \times 10^3$ ) for **2**.  $U(\text{eq})$  is defined as one third of the trace of the orthogonalized  $U^{ij}$  tensor.

|       | x         | y        | z       | U(eq) |
|-------|-----------|----------|---------|-------|
| N(1)  | 4969(14)  | 3291(8)  | 3858(4) | 39(2) |
| O(2)  | 3625(10)  | 5475(7)  | 3665(3) | 41(2) |
| N(3)  | 4537(14)  | 1638(8)  | 3777(5) | 46(2) |
| C(4)  | 1360(15)  | 6200(10) | 3405(5) | 39(2) |
| O(1)  | 7062(11)  | 3843(7)  | 4148(4) | 50(2) |
| N(2)  | 3064(13)  | 3905(8)  | 3546(4) | 38(2) |
| C(5)  | 1067(15)  | 6405(10) | 2492(6) | 35(2) |
| C(6)  | 2545(15)  | 5754(11) | 1935(6) | 45(3) |
| C(7)  | 2118(16)  | 6011(11) | 1112(6) | 51(3) |
| C(8)  | 174(16)   | 6816(11) | 818(6)  | 47(3) |
| C(9)  | -1305(17) | 7469(11) | 1374(6) | 53(3) |
| C(10) | -895(15)  | 7227(11) | 2201(6) | 46(3) |
| C(11) | 3166(15)  | 1031(12) | 4355(6) | 41(3) |
| O(11) | 2849(11)  | -368(7)  | 4294(4) | 56(2) |
| C(12) | 2175(15)  | 2120(11) | 4988(5) | 50(3) |
| C(13) | 6139(16)  | 759(11)  | 3262(6) | 50(3) |
| C(14) | 5903(16)  | 1183(11) | 2382(6) | 42(2) |
| C(15) | 3880(16)  | 573(11)  | 1837(6) | 51(3) |
| C(16) | 3620(16)  | 968(11)  | 1046(7) | 53(3) |
| C(17) | 5327(18)  | 1986(12) | 783(6)  | 59(3) |
| C(18) | 7304(16)  | 2611(12) | 1337(6) | 56(3) |
| C(19) | 7580(16)  | 2189(11) | 2136(6) | 51(3) |

**Table S3.** Bond lengths [Å] and angles [°] for **2**.

---

|                     |           |                     |           |
|---------------------|-----------|---------------------|-----------|
| N(1)-O(1)           | 1.237(7)  | N(1)-N(2)           | 1.266(8)  |
| N(1)-N(3)           | 1.444(10) | O(2)-N(2)           | 1.381(8)  |
| O(2)-C(4)           | 1.448(9)  | N(3)-C(11)          | 1.403(12) |
| N(3)-C(13)          | 1.462(11) | C(4)-C(5)           | 1.513(12) |
| C(4)-H(4A)          | 0.9900    | C(4)-H(4B)          | 0.9900    |
| C(5)-C(6)           | 1.374(12) | C(5)-C(10)          | 1.378(11) |
| C(6)-C(7)           | 1.383(12) | C(6)-H(6A)          | 0.9500    |
| C(7)-C(8)           | 1.364(12) | C(7)-H(7A)          | 0.9500    |
| C(8)-C(9)           | 1.373(12) | C(8)-H(8A)          | 0.9500    |
| C(9)-C(10)          | 1.386(12) | C(9)-H(9A)          | 0.9500    |
| C(10)-H(10A)        | 0.9500    | C(11)-O(11)         | 1.220(10) |
| C(11)-C(12)         | 1.489(13) | C(12)-H(12A)        | 0.9800    |
| C(12)-H(12B)        | 0.9800    | C(12)-H(12C)        | 0.9800    |
| C(13)-C(14)         | 1.517(12) | C(13)-H(13A)        | 0.9900    |
| C(13)-H(13B)        | 0.9900    | C(14)-C(19)         | 1.364(12) |
| C(14)-C(15)         | 1.381(11) | C(15)-C(16)         | 1.368(12) |
| C(15)-H(15A)        | 0.9500    | C(16)-C(17)         | 1.394(12) |
| C(16)-H(16A)        | 0.9500    | C(17)-C(18)         | 1.375(12) |
| C(17)-H(17A)        | 0.9500    | C(18)-C(19)         | 1.389(11) |
| C(18)-H(18A)        | 0.9500    | C(19)-H(19A)        | 0.9500    |
| O(1)-N(1)-N(2)      | 131.6(8)  | O(1)-N(1)-N(3)      | 118.2(7)  |
| N(2)-N(1)-N(3)      | 109.9(7)  | N(2)-O(2)-C(4)      | 106.4(6)  |
| C(11)-N(3)-N(1)     | 117.1(7)  | C(11)-N(3)-C(13)    | 125.0(8)  |
| N(1)-N(3)-C(13)     | 115.5(7)  | O(2)-C(4)-C(5)      | 112.8(7)  |
| O(2)-C(4)-H(4A)     | 109.0     | C(5)-C(4)-H(4A)     | 109.0     |
| O(2)-C(4)-H(4B)     | 109.0     | C(5)-C(4)-H(4B)     | 109.0     |
| H(4A)-C(4)-H(4B)    | 107.8     | N(1)-N(2)-O(2)      | 105.9(6)  |
| C(6)-C(5)-C(10)     | 118.5(9)  | C(6)-C(5)-C(4)      | 124.1(8)  |
| C(10)-C(5)-C(4)     | 117.3(9)  | C(5)-C(6)-C(7)      | 119.5(9)  |
| C(5)-C(6)-H(6A)     | 120.2     | C(7)-C(6)-H(6A)     | 120.2     |
| C(8)-C(7)-C(6)      | 122.2(9)  | C(8)-C(7)-H(7A)     | 118.9     |
| C(6)-C(7)-H(7A)     | 118.9     | C(7)-C(8)-C(9)      | 118.3(10) |
| C(7)-C(8)-H(8A)     | 120.9     | C(9)-C(8)-H(8A)     | 120.9     |
| C(8)-C(9)-C(10)     | 120.1(9)  | C(8)-C(9)-H(9A)     | 120.0     |
| C(10)-C(9)-H(9A)    | 120.0     | C(5)-C(10)-C(9)     | 121.2(9)  |
| C(5)-C(10)-H(10A)   | 119.4     | C(9)-C(10)-H(10A)   | 119.4     |
| O(11)-C(11)-N(3)    | 116.8(9)  | O(11)-C(11)-C(12)   | 124.6(10) |
| N(3)-C(11)-C(12)    | 118.5(9)  | C(11)-C(12)-H(12A)  | 109.5     |
| C(11)-C(12)-H(12B)  | 109.5     | H(12A)-C(12)-H(12B) | 109.5     |
| C(11)-C(12)-H(12C)  | 109.5     | H(12A)-C(12)-H(12C) | 109.5     |
| H(12B)-C(12)-H(12C) | 109.5     | N(3)-C(13)-C(14)    | 112.3(8)  |
| N(3)-C(13)-H(13A)   | 109.1     | C(14)-C(13)-H(13A)  | 109.1     |
| N(3)-C(13)-H(13B)   | 109.1     | C(14)-C(13)-H(13B)  | 109.1     |
| H(13A)-C(13)-H(13B) | 107.9     | C(19)-C(14)-C(15)   | 120.2(9)  |

---



**Continuation of table S3**

|                    |          |                    |          |
|--------------------|----------|--------------------|----------|
| C(19)-C(14)-C(13)  | 121.4(8) | C(15)-C(14)-C(13)  | 118.3(9) |
| C(16)-C(15)-C(14)  | 118.9(9) | C(16)-C(15)-H(15A) | 120.5    |
| C(14)-C(15)-H(15A) | 120.5    | C(15)-C(16)-C(17)  | 121.6(9) |
| C(15)-C(16)-H(16A) | 119.2    | C(17)-C(16)-H(16A) | 119.2    |
| C(18)-C(17)-C(16)  | 118.9(9) | C(18)-C(17)-H(17A) | 120.5    |
| C(16)-C(17)-H(17A) | 120.5    | C(17)-C(18)-C(19)  | 119.4(9) |
| C(17)-C(18)-H(18A) | 120.3    | C(19)-C(18)-H(18A) | 120.3    |
| C(14)-C(19)-C(18)  | 121.0(9) | C(14)-C(19)-H(19A) | 119.5    |
| C(18)-C(19)-H(19A) | 119.5    |                    |          |

---

**Table S4.** Anisotropic displacement parameters ( $\text{\AA}^2 \times 10^3$ ) for **2**. The anisotropic displacement factor exponent takes the form:  $-2\pi^2[h^2 a^{*2}U^{11} + \dots + 2 h k a^* b^* U^{12}]$

|       | U11   | U22   | U33   | U23    | U13   | U12    |
|-------|-------|-------|-------|--------|-------|--------|
| N(1)  | 38(5) | 42(6) | 39(5) | 5(4)   | 11(4) | 12(4)  |
| O(2)  | 50(4) | 25(4) | 46(4) | 2(3)   | 3(3)  | -1(3)  |
| N(3)  | 65(6) | 22(5) | 54(6) | 6(5)   | 16(4) | 9(4)   |
| C(4)  | 37(6) | 23(5) | 57(7) | -4(5)  | 14(4) | 7(4)   |
| O(1)  | 36(4) | 57(5) | 57(5) | 21(4)  | -4(3) | -7(3)  |
| N(2)  | 43(5) | 17(5) | 51(5) | -8(4)  | 8(4)  | 1(3)   |
| C(5)  | 27(5) | 26(6) | 49(7) | -1(5)  | 5(4)  | -5(4)  |
| C(6)  | 34(6) | 46(7) | 56(8) | 13(6)  | 6(5)  | -3(4)  |
| C(7)  | 37(6) | 58(7) | 61(8) | 2(6)   | 23(5) | 3(5)   |
| C(8)  | 39(6) | 53(7) | 49(7) | 4(6)   | 2(5)  | 2(5)   |
| C(9)  | 46(6) | 63(8) | 51(8) | 8(6)   | 8(5)  | 18(5)  |
| C(10) | 36(6) | 47(7) | 51(7) | -11(6) | 11(5) | 3(5)   |
| C(11) | 32(6) | 36(7) | 53(7) | 0(6)   | -5(5) | 6(4)   |
| O(11) | 62(5) | 31(4) | 75(5) | -4(4)  | 14(3) | -9(3)  |
| C(12) | 39(6) | 66(7) | 42(7) | -6(6)  | 10(4) | -1(5)  |
| C(13) | 56(6) | 36(6) | 64(8) | 9(6)   | 19(5) | 16(5)  |
| C(14) | 40(6) | 48(6) | 38(7) | 7(5)   | 2(5)  | 8(5)   |
| C(15) | 36(6) | 58(7) | 57(8) | 5(6)   | 4(5)  | -6(5)  |
| C(16) | 38(6) | 60(8) | 55(8) | -9(6)  | -4(5) | -6(5)  |
| C(17) | 62(7) | 76(9) | 40(7) | 13(6)  | 9(5)  | -5(6)  |
| C(18) | 46(7) | 72(8) | 53(8) | 10(7)  | 19(5) | -13(5) |
| C(19) | 41(6) | 63(8) | 46(7) | -2(6)  | 12(5) | -9(5)  |

**Table S5.** Hydrogen coordinates ( $\times 10^4$ ) and isotropic displacement parameters ( $\text{\AA}^2 \times 10^3$ ) for **2**.

|        | x     | y    | z    | U(eq) |
|--------|-------|------|------|-------|
| H(4A)  | 1354  | 7221 | 3733 | 47    |
| H(4B)  | -78   | 5564 | 3524 | 47    |
| H(6A)  | 3850  | 5131 | 2114 | 54    |
| H(7A)  | 3216  | 5612 | 739  | 61    |
| H(8A)  | -149  | 6924 | 244  | 57    |
| H(9A)  | -2612 | 8086 | 1190 | 63    |
| H(10A) | -1986 | 7635 | 2574 | 55    |
| H(12A) | 1516  | 1542 | 5403 | 75    |
| H(12B) | 845   | 2681 | 4718 | 75    |
| H(12C) | 3512  | 2853 | 5259 | 75    |
| H(13A) | 5701  | -354 | 3248 | 61    |
| H(13B) | 7886  | 951  | 3514 | 61    |
| H(15A) | 2688  | -111 | 2009 | 61    |
| H(16A) | 2245  | 540  | 666  | 64    |
| H(17A) | 5127  | 2244 | 230  | 70    |
| H(18A) | 8469  | 3324 | 1174 | 67    |
| H(19A) | 8958  | 2607 | 2517 | 61    |

**Table S6.** Torsion angles [°] for **2**.

---

|                         |           |
|-------------------------|-----------|
| O(1)-N(1)-N(3)-C(11)    | 104.7(8)  |
| N(2)-N(1)-N(3)-C(11)    | -80.1(9)  |
| O(1)-N(1)-N(3)-C(13)    | -58.5(10) |
| N(2)-N(1)-N(3)-C(13)    | 116.7(8)  |
| N(2)-O(2)-C(4)-C(5)     | -88.8(8)  |
| O(1)-N(1)-N(2)-O(2)     | -6.8(11)  |
| N(3)-N(1)-N(2)-O(2)     | 178.9(6)  |
| C(4)-O(2)-N(2)-N(1)     | -173.0(7) |
| O(2)-C(4)-C(5)-C(6)     | 10.3(11)  |
| O(2)-C(4)-C(5)-C(10)    | -173.4(7) |
| C(10)-C(5)-C(6)-C(7)    | 3.6(13)   |
| C(4)-C(5)-C(6)-C(7)     | 179.9(8)  |
| C(5)-C(6)-C(7)-C(8)     | -4.1(14)  |
| C(6)-C(7)-C(8)-C(9)     | 4.1(15)   |
| C(7)-C(8)-C(9)-C(10)    | -3.7(14)  |
| C(6)-C(5)-C(10)-C(9)    | -3.4(13)  |
| C(4)-C(5)-C(10)-C(9)    | -179.9(8) |
| C(8)-C(9)-C(10)-C(5)    | 3.5(14)   |
| N(1)-N(3)-C(11)-O(11)   | -178.6(7) |
| C(13)-N(3)-C(11)-O(11)  | -17.1(13) |
| N(1)-N(3)-C(11)-C(12)   | 2.3(11)   |
| C(13)-N(3)-C(11)-C(12)  | 163.7(8)  |
| C(11)-N(3)-C(13)-C(14)  | 139.2(8)  |
| N(1)-N(3)-C(13)-C(14)   | -59.1(10) |
| N(3)-C(13)-C(14)-C(19)  | 98.5(11)  |
| N(3)-C(13)-C(14)-C(15)  | -78.9(11) |
| C(19)-C(14)-C(15)-C(16) | 1.3(15)   |
| C(13)-C(14)-C(15)-C(16) | 178.8(10) |
| C(14)-C(15)-C(16)-C(17) | -0.9(16)  |
| C(15)-C(16)-C(17)-C(18) | -0.4(16)  |
| C(16)-C(17)-C(18)-C(19) | 1.4(16)   |
| C(15)-C(14)-C(19)-C(18) | -0.4(15)  |
| C(13)-C(14)-C(19)-C(18) | -177.8(9) |
| C(17)-C(18)-C(19)-C(14) | -0.9(16)  |

---

Symmetry transformations used to generate equivalent atoms:

**Table S7.** Crystal data and structure refinement for **4b**.

|                                      |                                             |                            |
|--------------------------------------|---------------------------------------------|----------------------------|
| Empirical formula                    | $C_{20}H_{18}N_4O_3$                        |                            |
| Formula weight                       | 362.38                                      |                            |
| Temperature                          | 150(2) K                                    |                            |
| Wavelength                           | 0.71073 Å                                   |                            |
| Crystal system                       | Monoclinic                                  |                            |
| Space group                          | C 2/c                                       |                            |
| Unit cell dimensions                 | $a = 18.3109(19)$ Å                         | $\alpha = 90^\circ$        |
|                                      | $b = 10.8087(9)$ Å                          | $\beta = 109.785(4)^\circ$ |
|                                      | $c = 20.0132(16)$ Å                         | $\gamma = 90^\circ$        |
| Volume                               | $3727.1(6)$ Å <sup>3</sup>                  |                            |
| Z                                    | 8                                           |                            |
| Density (calculated)                 | 1.292 Mg/m <sup>3</sup>                     |                            |
| Absorption coefficient               | 0.090 mm <sup>-1</sup>                      |                            |
| F(000)                               | 1520                                        |                            |
| Crystal size                         | 0.375 x 0.101 x 0.082 mm <sup>3</sup>       |                            |
| $\phi$ range for data collection     | 2.16 to 28.33°                              |                            |
| Index ranges                         | -24 ≤ h ≤ 24, -14 ≤ k ≤ 14, -22 ≤ l ≤ 26    |                            |
| Reflections collected                | 20155                                       |                            |
| Independent reflections              | 4639 [R(int) = 0.0770]                      |                            |
| Completeness to $\phi = 28.33^\circ$ | 99.6 %                                      |                            |
| Absorption correction                | Semi-empirical from equivalents             |                            |
| Max. and min. transmission           | 0.9927 and 0.9671                           |                            |
| Refinement method                    | Full-matrix least-squares on F <sup>2</sup> |                            |
| Data / restraints / parameters       | 4639 / 0 / 244                              |                            |
| Goodness-of-fit on F <sup>2</sup>    | 0.839                                       |                            |
| Final R indices [I > 2σ(I)]          | R1 = 0.0454, wR2 = 0.1252                   |                            |
| R indices (all data)                 | R1 = 0.0863, wR2 = 0.1423                   |                            |
| Largest diff. peak and hole          | 0.575 and -0.229 e.Å <sup>-3</sup>          |                            |

**Table S8.** Atomic coordinates ( $\times 10^4$ ) and equivalent isotropic displacement parameters ( $\text{\AA}^2 \times 10^3$ ) for **4b**.  $U(\text{eq})$  is defined as one third of the trace of the orthogonalized  $U^{\text{ij}}$  tensor.

|       | x       | y       | z        | U(eq) |
|-------|---------|---------|----------|-------|
| O(1)  | 3121(1) | 5954(1) | 1813(1)  | 30(1) |
| N(1)  | 2544(1) | 5931(1) | 1248(1)  | 19(1) |
| O(2)  | 1813(1) | 6006(1) | 1898(1)  | 25(1) |
| N(2)  | 1833(1) | 5952(1) | 1204(1)  | 23(1) |
| C(3)  | 1001(1) | 6070(2) | 1843(1)  | 34(1) |
| N(3)  | 2673(1) | 6001(1) | 596(1)   | 21(1) |
| C(4)  | 988(1)  | 6497(2) | 2551(1)  | 26(1) |
| C(5)  | 1013(1) | 7757(2) | 2701(1)  | 30(1) |
| C(6)  | 997(1)  | 8174(2) | 3351(1)  | 35(1) |
| C(7)  | 954(1)  | 7336(2) | 3854(1)  | 37(1) |
| C(8)  | 929(1)  | 6090(2) | 3714(1)  | 36(1) |
| C(9)  | 946(1)  | 5669(2) | 3068(1)  | 31(1) |
| O(10) | 2357(1) | 3912(1) | 459(1)   | 27(1) |
| C(10) | 2562(1) | 4909(2) | 269(1)   | 19(1) |
| C(11) | 2729(1) | 4957(2) | -415(1)  | 18(1) |
| C(12) | 2842(1) | 3846(2) | -710(1)  | 18(1) |
| N(13) | 2986(1) | 3822(1) | -1327(1) | 18(1) |
| C(14) | 2996(1) | 4868(2) | -1689(1) | 22(1) |
| C(15) | 2878(1) | 5990(2) | -1419(1) | 25(1) |
| C(16) | 2755(1) | 6047(2) | -775(1)  | 22(1) |
| C(17) | 3184(1) | 2624(2) | -1599(1) | 20(1) |
| C(18) | 4051(1) | 2412(2) | -1292(1) | 21(1) |
| C(19) | 4364(1) | 1755(2) | -665(1)  | 26(1) |
| C(20) | 5159(1) | 1623(2) | -358(1)  | 34(1) |
| C(21) | 5648(1) | 2150(2) | -673(1)  | 39(1) |
| C(22) | 5342(1) | 2786(2) | -1303(1) | 45(1) |
| C(23) | 4544(1) | 2912(2) | -1614(1) | 34(1) |

**Table S9.** Bond lengths [Å] and angles [°] for **4b**.

---

|                    |            |                    |            |
|--------------------|------------|--------------------|------------|
| O(1)-N(1)          | 1.2608(18) | N(1)-N(2)          | 1.276(2)   |
| N(1)-N(3)          | 1.404(2)   | O(2)-N(2)          | 1.4030(19) |
| O(2)-C(3)          | 1.454(2)   | C(3)-C(4)          | 1.499(3)   |
| C(3)-H(3A)         | 0.9900     | C(3)-H(3B)         | 0.9900     |
| N(3)-C(10)         | 1.332(2)   | C(4)-C(9)          | 1.389(3)   |
| C(4)-C(5)          | 1.392(3)   | C(5)-C(6)          | 1.387(3)   |
| C(5)-H(5A)         | 0.9500     | C(6)-C(7)          | 1.376(3)   |
| C(6)-H(6A)         | 0.9500     | C(7)-C(8)          | 1.374(3)   |
| C(7)-H(7A)         | 0.9500     | C(8)-C(9)          | 1.380(3)   |
| C(8)-H(8A)         | 0.9500     | C(9)-H(9A)         | 0.9500     |
| O(10)-C(10)        | 1.2417(19) | C(10)-C(11)        | 1.503(2)   |
| C(11)-C(12)        | 1.384(2)   | C(11)-C(16)        | 1.389(2)   |
| C(12)-N(13)        | 1.346(2)   | C(12)-H(12A)       | 0.9500     |
| N(13)-C(14)        | 1.346(2)   | N(13)-C(17)        | 1.497(2)   |
| C(14)-C(15)        | 1.374(2)   | C(14)-H(14A)       | 0.9500     |
| C(15)-C(16)        | 1.384(2)   | C(15)-H(15A)       | 0.9500     |
| C(16)-H(16A)       | 0.9500     | C(17)-C(18)        | 1.513(2)   |
| C(17)-H(17A)       | 0.9900     | C(17)-H(17B)       | 0.9900     |
| C(18)-C(23)        | 1.384(3)   | C(18)-C(19)        | 1.386(3)   |
| C(19)-C(20)        | 1.383(3)   | C(19)-H(19A)       | 0.9500     |
| C(20)-C(21)        | 1.379(3)   | C(20)-H(20A)       | 0.9500     |
| C(21)-C(22)        | 1.377(3)   | C(21)-H(21A)       | 0.9500     |
| C(22)-C(23)        | 1.388(3)   | C(22)-H(22A)       | 0.9500     |
| C(23)-H(23A)       | 0.9500     | O(1)-N(1)-N(2)     | 126.03(15) |
| O(1)-N(1)-N(3)     | 118.60(14) | N(2)-N(1)-N(3)     | 115.11(14) |
| N(2)-O(2)-C(3)     | 107.16(13) | N(1)-N(2)-O(2)     | 107.50(13) |
| O(2)-C(3)-C(4)     | 106.66(15) | O(2)-C(3)-H(3A)    | 110.4      |
| C(4)-C(3)-H(3A)    | 110.4      | O(2)-C(3)-H(3B)    | 110.4      |
| C(4)-C(3)-H(3B)    | 110.4      | H(3A)-C(3)-H(3B)   | 108.6      |
| C(10)-N(3)-N(1)    | 111.24(13) | C(9)-C(4)-C(5)     | 118.49(19) |
| C(9)-C(4)-C(3)     | 121.91(19) | C(5)-C(4)-C(3)     | 119.60(19) |
| C(6)-C(5)-C(4)     | 120.6(2)   | C(6)-C(5)-H(5A)    | 119.7      |
| C(4)-C(5)-H(5A)    | 119.7      | C(7)-C(6)-C(5)     | 119.9(2)   |
| C(7)-C(6)-H(6A)    | 120.1      | C(5)-C(6)-H(6A)    | 120.1      |
| C(8)-C(7)-C(6)     | 120.1(2)   | C(8)-C(7)-H(7A)    | 119.9      |
| C(6)-C(7)-H(7A)    | 119.9      | C(7)-C(8)-C(9)     | 120.4(2)   |
| C(7)-C(8)-H(8A)    | 119.8      | C(9)-C(8)-H(8A)    | 119.8      |
| C(4)-C(9)-C(8)     | 120.6(2)   | C(4)-C(9)-H(9A)    | 119.7      |
| C(8)-C(9)-H(9A)    | 119.7      | O(10)-C(10)-N(3)   | 129.16(16) |
| O(10)-C(10)-C(11)  | 118.98(15) | N(3)-C(10)-C(11)   | 111.85(14) |
| C(12)-C(11)-C(16)  | 118.61(16) | C(12)-C(11)-C(10)  | 117.67(15) |
| C(16)-C(11)-C(10)  | 123.69(15) | N(13)-C(12)-C(11)  | 120.72(15) |
| N(13)-C(12)-H(12A) | 119.6      | C(11)-C(12)-H(12A) | 119.6      |
| C(14)-N(13)-C(12)  | 121.35(15) | C(14)-N(13)-C(17)  | 118.76(15) |

---

**Continuation of table S9**

|                    |            |                     |            |
|--------------------|------------|---------------------|------------|
| C(12)-N(13)-C(17)  | 119.80(14) | N(13)-C(14)-C(15)   | 119.78(17) |
| N(13)-C(14)-H(14A) | 120.1      | C(15)-C(14)-H(14A)  | 120.1      |
| C(14)-C(15)-C(16)  | 120.15(17) | C(14)-C(15)-H(15A)  | 119.9      |
| C(16)-C(15)-H(15A) | 119.9      | C(15)-C(16)-C(11)   | 119.32(16) |
| C(15)-C(16)-H(16A) | 120.3      | C(11)-C(16)-H(16A)  | 120.3      |
| N(13)-C(17)-C(18)  | 109.45(14) | N(13)-C(17)-H(17A)  | 109.8      |
| C(18)-C(17)-H(17A) | 109.8      | N(13)-C(17)-H(17B)  | 109.8      |
| C(18)-C(17)-H(17B) | 109.8      | H(17A)-C(17)-H(17B) | 108.2      |
| C(23)-C(18)-C(19)  | 119.12(18) | C(23)-C(18)-C(17)   | 120.77(17) |
| C(19)-C(18)-C(17)  | 120.06(16) | C(20)-C(19)-C(18)   | 120.37(18) |
| C(20)-C(19)-H(19A) | 119.8      | C(18)-C(19)-H(19A)  | 119.8      |
| C(19)-C(20)-C(21)  | 120.2(2)   | C(19)-C(20)-H(20A)  | 119.9      |
| C(21)-C(20)-H(20A) | 119.9      | C(22)-C(21)-C(20)   | 119.9(2)   |
| C(22)-C(21)-H(21A) | 120.1      | C(20)-C(21)-H(21A)  | 120.1      |
| C(21)-C(22)-C(23)  | 120.0(2)   | C(21)-C(22)-H(22A)  | 120.0      |
| C(23)-C(22)-H(22A) | 120.0      | C(18)-C(23)-C(22)   | 120.4(2)   |
| C(18)-C(23)-H(23A) | 119.8      | C(22)-C(23)-H(23A)  | 119.8      |

---



**Table S10.** Anisotropic displacement parameters ( $\text{\AA}^2 \times 10^3$ ) for **4b**. The anisotropic displacement factor exponent takes the form:  $-2\sum^2 [h^2 a^{*2} U^{11} + \dots + 2 h k a^* b^* U^{12}]$

|       | U11   | U22   | U33   | U23    | U13   | U12   |
|-------|-------|-------|-------|--------|-------|-------|
| O(1)  | 24(1) | 49(1) | 17(1) | 0(1)   | 6(1)  | -1(1) |
| N(1)  | 27(1) | 17(1) | 16(1) | -1(1)  | 10(1) | 0(1)  |
| O(2)  | 24(1) | 36(1) | 18(1) | -2(1)  | 11(1) | 1(1)  |
| N(2)  | 28(1) | 27(1) | 17(1) | -1(1)  | 11(1) | 2(1)  |
| C(3)  | 23(1) | 51(1) | 31(1) | -12(1) | 13(1) | -3(1) |
| N(3)  | 33(1) | 18(1) | 17(1) | -3(1)  | 15(1) | -3(1) |
| C(4)  | 17(1) | 38(1) | 26(1) | -5(1)  | 9(1)  | -1(1) |
| C(5)  | 28(1) | 36(1) | 31(1) | 1(1)   | 15(1) | -4(1) |
| C(6)  | 31(1) | 39(1) | 38(1) | -13(1) | 14(1) | -5(1) |
| C(7)  | 29(1) | 61(2) | 23(1) | -7(1)  | 10(1) | -5(1) |
| C(8)  | 25(1) | 55(2) | 28(1) | 10(1)  | 9(1)  | 0(1)  |
| C(9)  | 24(1) | 34(1) | 36(1) | 1(1)   | 11(1) | 1(1)  |
| O(10) | 45(1) | 17(1) | 25(1) | 0(1)   | 21(1) | -4(1) |
| C(10) | 20(1) | 19(1) | 17(1) | 2(1)   | 8(1)  | 3(1)  |
| C(11) | 20(1) | 17(1) | 15(1) | -1(1)  | 6(1)  | -1(1) |
| C(12) | 20(1) | 18(1) | 16(1) | 2(1)   | 7(1)  | 0(1)  |
| N(13) | 21(1) | 18(1) | 16(1) | -1(1)  | 7(1)  | 0(1)  |
| C(14) | 30(1) | 23(1) | 15(1) | 1(1)   | 11(1) | -3(1) |
| C(15) | 36(1) | 19(1) | 21(1) | 3(1)   | 13(1) | 0(1)  |
| C(16) | 30(1) | 17(1) | 19(1) | 0(1)   | 10(1) | 0(1)  |
| C(17) | 28(1) | 17(1) | 18(1) | -4(1)  | 11(1) | 0(1)  |
| C(18) | 25(1) | 20(1) | 22(1) | -2(1)  | 10(1) | 0(1)  |
| C(19) | 30(1) | 24(1) | 24(1) | -2(1)  | 12(1) | 0(1)  |
| C(20) | 33(1) | 34(1) | 30(1) | -1(1)  | 5(1)  | 6(1)  |
| C(21) | 25(1) | 40(1) | 50(2) | -5(1)  | 9(1)  | 4(1)  |
| C(22) | 31(1) | 49(1) | 63(2) | 5(1)   | 27(1) | 0(1)  |
| C(23) | 34(1) | 39(1) | 36(1) | 8(1)   | 20(1) | 5(1)  |

**Table S11.** Hydrogen coordinates ( $\times 10^4$ ) and isotropic displacement parameters ( $\text{\AA}^2 \times 10^3$ ) for **4b**.

|        | x    | y    | z     | U(eq) |
|--------|------|------|-------|-------|
| H(3A)  | 754  | 5247 | 1725  | 40    |
| H(3B)  | 718  | 6662 | 1466  | 40    |
| H(5A)  | 1043 | 8338 | 2354  | 36    |
| H(6A)  | 1015 | 9035 | 3449  | 42    |
| H(7A)  | 940  | 7620 | 4299  | 44    |
| H(8A)  | 901  | 5515 | 4063  | 43    |
| H(9A)  | 929  | 4805 | 2976  | 37    |
| H(12A) | 2816 | 3091 | -476  | 21    |
| H(14A) | 3084 | 4830 | -2130 | 26    |
| H(15A) | 2880 | 6728 | -1676 | 29    |
| H(16A) | 2690 | 6823 | -580  | 26    |
| H(17A) | 3018 | 2648 | -2124 | 25    |
| H(17B) | 2907 | 1936 | -1461 | 25    |
| H(19A) | 4030 | 1394 | -445  | 31    |
| H(20A) | 5370 | 1168 | 70    | 41    |
| H(21A) | 6194 | 2075 | -456  | 47    |
| H(22A) | 5677 | 3138 | -1524 | 53    |
| H(23A) | 4335 | 3345 | -2051 | 41    |

**Table S12.** Torsion angles [°] for **4b**.

---

|                         |             |
|-------------------------|-------------|
| O(1)-N(1)-N(2)-O(2)     | 0.1(2)      |
| N(3)-N(1)-N(2)-O(2)     | -173.95(12) |
| C(3)-O(2)-N(2)-N(1)     | 178.14(14)  |
| N(2)-O(2)-C(3)-C(4)     | -163.76(15) |
| O(1)-N(1)-N(3)-C(10)    | 106.09(17)  |
| N(2)-N(1)-N(3)-C(10)    | -79.39(18)  |
| O(2)-C(3)-C(4)-C(9)     | -95.1(2)    |
| O(2)-C(3)-C(4)-C(5)     | 85.2(2)     |
| C(9)-C(4)-C(5)-C(6)     | -0.1(3)     |
| C(3)-C(4)-C(5)-C(6)     | 179.60(17)  |
| C(4)-C(5)-C(6)-C(7)     | 0.0(3)      |
| C(5)-C(6)-C(7)-C(8)     | 0.2(3)      |
| C(6)-C(7)-C(8)-C(9)     | -0.2(3)     |
| C(5)-C(4)-C(9)-C(8)     | 0.1(3)      |
| C(3)-C(4)-C(9)-C(8)     | -179.57(17) |
| C(7)-C(8)-C(9)-C(4)     | 0.0(3)      |
| N(1)-N(3)-C(10)-O(10)   | 1.3(3)      |
| N(1)-N(3)-C(10)-C(11)   | -177.71(13) |
| O(10)-C(10)-C(11)-C(12) | -16.2(2)    |
| N(3)-C(10)-C(11)-C(12)  | 162.97(15)  |
| O(10)-C(10)-C(11)-C(16) | 161.94(16)  |
| N(3)-C(10)-C(11)-C(16)  | -18.9(2)    |
| C(16)-C(11)-C(12)-N(13) | 1.1(3)      |
| C(10)-C(11)-C(12)-N(13) | 179.35(15)  |
| C(11)-C(12)-N(13)-C(14) | -2.7(3)     |
| C(11)-C(12)-N(13)-C(17) | 173.93(15)  |
| C(12)-N(13)-C(14)-C(15) | 1.8(3)      |
| C(17)-N(13)-C(14)-C(15) | -174.81(16) |
| N(13)-C(14)-C(15)-C(16) | 0.5(3)      |
| C(14)-C(15)-C(16)-C(11) | -2.0(3)     |
| C(12)-C(11)-C(16)-C(15) | 1.2(3)      |
| C(10)-C(11)-C(16)-C(15) | -176.93(16) |
| C(14)-N(13)-C(17)-C(18) | 88.78(18)   |
| C(12)-N(13)-C(17)-C(18) | -87.91(18)  |
| N(13)-C(17)-C(18)-C(23) | -85.6(2)    |
| N(13)-C(17)-C(18)-C(19) | 91.62(19)   |
| C(23)-C(18)-C(19)-C(20) | 1.2(3)      |
| C(17)-C(18)-C(19)-C(20) | -176.00(16) |
| C(18)-C(19)-C(20)-C(21) | 0.4(3)      |
| C(19)-C(20)-C(21)-C(22) | -1.5(3)     |
| C(20)-C(21)-C(22)-C(23) | 1.0(3)      |
| C(19)-C(18)-C(23)-C(22) | -1.7(3)     |
| C(17)-C(18)-C(23)-C(22) | 175.51(18)  |
| C(21)-C(22)-C(23)-C(18) | 0.6(3)      |

---
